# Supplementary material
Source: Springer Nature journal article supplement (https://www.springermedizin.de/resource/supplementary/13256_2011_2059_MOESM1_ESM.pdf/9649782)

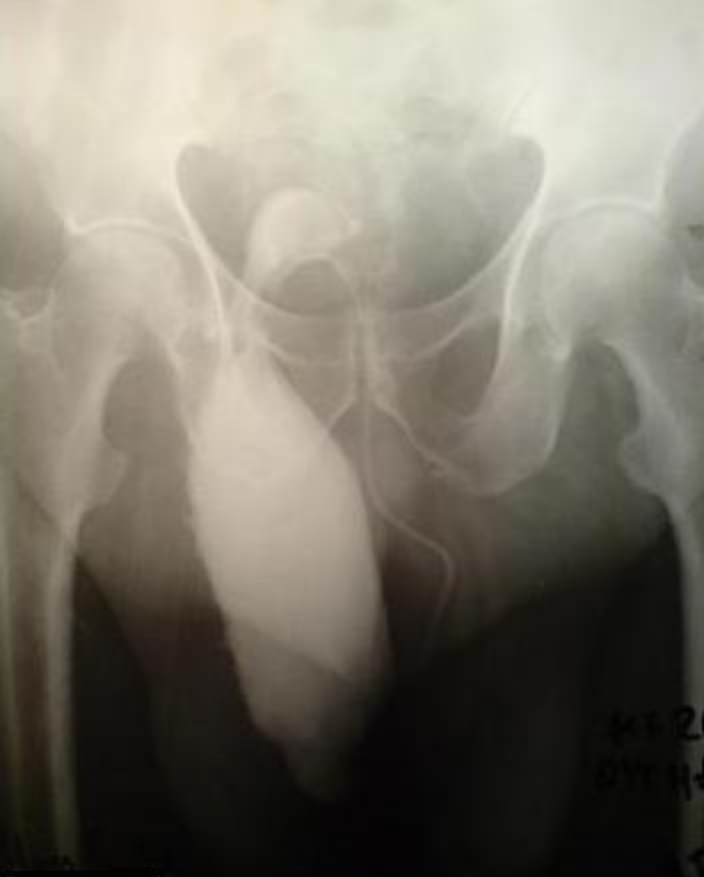

L5  
DTH

Supplement: MOESM1 [file 9649782]
